# Supplementary material for: Phosphoproteomics Identifies Oncogenic Ras Signaling Targets and Their Involvement in Lung Adenocarcinomas
Source: PLoS One. 2011 May 26;6(5):e20199. doi: 10.1371/journal.pone.0020199 (PMC3102680; doi:10.1371/journal.pone.0020199)
Supplement: Table S3 — Frequency of upstream kinases of regulated phosphorylation events identified in 3KTR, A549, H322 and H1299 cells. The upstream kinases of regulated phosphorylation events identified in individual pairs of cell lines were predicted by NetworKIN analysis. According to their target sequences, the upstream kinases were grouped into subsets of proline-directed, basophilic, acidophilic, and other kinases. The kinases targeting other than proline-directed, basophilic and acidophilic S/T sites are shown. The frequencies of subsets of kinases are listed. (XLS) [file pone.0020199.s008.xls]

## Sheet: Table 1
NetworKIN analysis of regulated phosphosites
Subgroups	Upstream kinases	Frequency of kinases identified
		3KTR/3KT	A549/3KT	H322/3KT	H1299/3KT
Proline directed	CDK2/3	39	148	161	113
	CDK4/6	2	6	8	6
	CDK5			2
	GSK3	12	22	32	22
	MAPK8/9/10 (JNK)	27	111	114	87
	MAPK3/1/7_NLK		3	3
	MAPK11/13/14 (p38)	39	186	225	143
	Sub-total	119 (45.1)	476 (43.4)	545 (46.0)	371 (36.9)
Basophilic	AuroraC_AuroraB	1	8	3	7
	AuroraA		8	7	6
	CaMKIIalpha/delta				1
	CaMKIIbeta/gamma	1	7	13	15
	CLK	8	41	46	46
	DMPK	8	33	28	34
	MAPKAPK	6	15	18	18
	p70S6K	2	19	27	31
	PAKA	6	18	18	21
	PAKB	10	30	22	31
	Pim2	6	30	34	39
	Pim3/1		10	13	20
	PKA	4	26	26	28
	PKB	4	22	22	30
	PKC	12	36	42	54
	RCK	5	17	28	22
	SGK			2	1
	SLK	1	3	1	2
	Sub-total	74 (28.0)	323 (29.4)	350 (29.6)	406 (40.4)
Acidophilic	CK2	10 (3.8)	156 (14.2)	136 (11.5)	110 (10.9)
Others	ACTR2/2B_TGFbR2	14	61	54	49
	AMPK	6	6	10	6
	ATM_ATR	6	18	20	16
	CK1	12	3	9	3
	DNAPK	1	1	1	1
	EphA7/6/4/3/5	3	6	3	6
	FLT3_CSF1R_Kit		2	2	2
	InsR		8	4	2
	LKB1			1	4
	MAP2K6/3/4/7	4	12	12	3
	MSN	2	2	8	4
	MST	1	4	4	4
	NEK1/5/3/4/11/2	9	13	13	13
	PKD	1	3	6	1
	ROCK
	TLK	1	1	4	3
	YSK	1	3	2	1
	Sub-total	61 (23.1)	143 (13.0)	153 (12.9)	118 (11.7)
Total		264 (100)	1098 (100)	1184 (100)	1005 (100)
