# Supplementary material for: Phosphoproteomics Identifies Oncogenic Ras Signaling Targets and Their Involvement in Lung Adenocarcinomas
Source: PLoS One. 2011 May 26;6(5):e20199. doi: 10.1371/journal.pone.0020199 (PMC3102680; doi:10.1371/journal.pone.0020199)
Supplement: Table S4 — The oncogenic Ras-regulated phosphorylation events were identified in 3KTR and their status is shown in NSCLC cells. The regulated phosphorylation events in HBECs upon oncogenic Ras-transformation (3KTR vs 3KT) are shown in Log2 scale. The relative levels of these phosphorylation events in NSCLC cells (A549 or H322 or H1299 vs 3KT) in relation to 3KT are shown. The regulated phosphosites were listed as proline-directed, basophilic, acidophilic and others. The relative phosphorylation levels with 2-fold increase or decrease are indicated by bold font. Few peptides were not quantified by IDEAL-Q and such peptides were indicated as NaN, -9999, and 9999. In the case of 3KTR vs 3KT, if the peptide was not identified in both cell lines or identified in 3KTR only or identified in 3KT only then they were indicated as NaN, 9999 and -9999, respectively. The protein symbol, full name, and Swiss-Port database protein accession number corresponding to each phosphopeptide, along with phosphorylated residue location, and NetworKIN assessment of upstream kinases are shown. In the table, (A) indicates peptides listed here only when they regulated in 3KTR in relation to 3KT with exception for MAPK1 T185, MAPK3 Y204 and MAPK14 Y182 peptides. (B) indicates MEK1/2 kinases were not covered by NetworKIN. (C) indicates MAP kinases are listed for the regulated sites according to the NetworKIN specificity. (I) indicates isoform. (XLS) [file pone.0020199.s009.xls]

## Sheet: Sheet1
Gene	Name	Swiss-prot ID	Peptide sequence	Residue	Log2 Ratio				NetworKIN (C)
					3KTR/3KT	A549/3KT	H322/3KT	H1299/3KT
Upregulated phosphorylation events
MAP Kinases (A)
MAPK1	MAP Kinase, ERK2	P28482	VADPDHDHTGFLTEpYVATR	Y187	1.94598	1.02432	1.59884	-1.30757	MEK1/2 were not covered (B)
			VADPDHDHTGFLpTEYVATR	T185	-0.434403	0.285698	2.45154	-9999
MAPK3	MAP Kinase, ERK1	P27361	IADPEHDHTGFLTEpYVATR	Y204	9999	9999	9999	9999
MAPK14	p38alpha, MAP kinase	Q16539	HTDDEMTGpYVATR	Y182	0.593593	0.455229	0.27858	0.45628	MAP2K3/6/4
Proline directed phosphosites
AHNAK	AHNAK 313 kDa protein	B5MEH8	VKpTPEMIIQKPK	T243	1.95531	0.0071955	0.283329	-0.139236
			ApSLGSLEGEAEAEASpSPK	S2833	1.09963	-9999	0.0662614	-0.444184
BAT3	Large proline-rich protein BAT3 (I)	P46379	APPQTHLPSGASSGTGSASATHGGGpSPPGTR	S113	1.71765	1.68032	2.42304	0.805705	CDK2, MAPK14/11/13
BCLAF1	Bcl-2-associated transcription factor 1 (I)	Q9NYF8	SSATSGDIWPGLSAYDNpSPR	S222	1.10367	1.61164	1.17568	0.687956
BRD8	Bromodomain-containing protein 8 (I)	Q9H0E9	ApTPPPSPLLSELLK	T124	1.25338	1.43029	0.248535	0.762136
COBRA1	Negative elongation factor B	Q8WX92	KPSPAQAAEpTPALELPLPSVPAPAPL	T564	1.59311	1.54003	1.82944	0.513996
			KPpSPAQAAETPALELPLPSVPAPAPL	S557	1.5888	1.53057	1.82701	0.477159	MAPK8/10/9, CDK2, MAPK/14/11/13
CTTN	Cortactin	Q8N707	TQpTPPVSPAPQPTEER	T364	1.06488	1.05242	1.23573	-1.68038
EPN1	Epsin-1(I)	Q9Y6I3	pSPGAFDMSGVR	S410	1.41197	-0.897006	1.82049	-9999
FAM129B	Niban-like protein	Q96TA1	AAPEASpSPPASPLQHLLPGK	S679	2.10668	1.75232	1.55582	-9999
FAM40A	Protein FAM40A (I)	Q5VSL9	AApSPPASASDLIEQQQK	S71	1.97012	0.948601	-0.0320936	-9999
IFI16	Interferon gamma-inducible protein 16 (I)	Q16666	VSEEQTQPPpSPAGAGMSTAMGR	S153	1.31267	-9999	-9999	-9999
LMNA	Lamin-A/C (I)	P02545	LSPpSPTSQR	S392	1.73725	1.10165	1.47508	0.977463	MAPK14/11/13
			LpSPSPTSQR	S390	1.19283	1.09828	1.08406	0.974529	CDK2, DMPK, MAPK8/10/9, MAPK14/11/13
LMO7	LIM domain only protein 7 (I)	Q8WWI1	SHpSPSASQSGSQLR	S1259	1.05728	2.61871	2.82762	2.13422	MAPK14/11/13, MOK, MAPK/8/10/9, CDK2, GSK3B, GSK3A
MAP4	Microtubule-associated protein 4 (I)	P27816	ELPPpSPEKK	S696	1.1137	1.16285	0.115033	0.962734
MICAL1	NEDD9-interacting protein with calponin homology and LIM domains (I)	Q8TDZ2	LSpSPERQR	S829	1.73725	1.10836	1.21971	0.972325	CDK2, MAPK14/11/13, MOK, CLK1, CLK2, MAPK/8/10/9
NCL	Nucleolin (I)	P19338	KVVVpSPTK	S67	1.25096	0.653519	-0.343732	-0.662004
PDLIM2	PDZ and LIM domain protein 2 (I)	Q96JY6	AGDSAVLVLPPpSPGPR	S197	1.4756	-0.512514	0.0854247	-0.946194
PPP1R13L	RelA-associated inhibitor (I)	Q8WUF5	SESAPTLHPYSPLpSPK	S113	1.21785	1.23511	1.68796	0.532068
RCC1	Regulator of chromosome condensation 1(I)	Q6NT97	RRpSPPADAIPK	S11	1.90111	0.583038	2.24001	-9999
SAMHD1	SAM domain and HD domain containing protein 1	Q9Y3Z3	TPSNTPSAEADWpSPGLELHPDYK	S33	1.3488	1.07587	0.650765	1.49211
SEC31A	SEC31 homolog A (I)	O94979	EQTLpSPTITSGLHNIAR	S1124	1.1884	0.481299	0.635987	-9999	CDK2, MAPK8/10/9
SIPA1L1	Signal-induced proliferation-associated 1 -like protein 1 (I)	O43166	LIDLEpSPTPESQK	S1549	1.09018	-9999	-9999	-9999	CDK2, MAPK14/11/13, MAPK8/10/9
			LIDLESPpTPESQK	T1551	1.08542	-9999	-9999	-9999	CDK2, MAPK14/11/13, MAPK8/10/9
SRRM1	Serine/arginine repetitive matrix protein 1(I)	Q8IYB3	APQTSSpSPPPVR	S696	1.64247	1.69109	0.755315	-0.086201
SRRM2	Serine/arginine repetitive	Q9UQ35	SRpTPPSAPSQSR	T2409	1.36065	1.83835	1.46048	0.62293
	matrix protein 2 (I)		VKPEpTPPR	T983	1.31904	1.65855	-9999	-9999
			QSHSEpSPSLQSK	S1083	1.05033	-9999	0.884403	-9999	CDK2, MAPK9/10/8
TMPO	Thymopoietin zeta (I)	A2T926	AKpTPVTLK	T208	1.15963	0.222805	-0.564905	-0.878321
UBAP2L	Ubiquitin-associated protein 2-like (I)	Q14157	SPAVATSTAAPPPPSpSPLPSK	S454	1.03422	0.945608	1.05936	0.0621217
Basic phosphosites
AHNAK	AHNAK 313 kDa protein	B5MEH8	EFpSGPSTPTGTLEFEGGEVSLEGGK	S2860	1.00576	-9999	1.63087	-0.311148
HN1	Hematological and neurological expressed 1protein (I)	Q9UK76	NpSSEASSGDFLDLK	S87	1.10836	-9999	2.39534	2.65947
NUFIP2	Nuclear fragile X mental ret-ardation-interacting protein 2	Q7Z417	NDpSWGSFDLR	S652	1.14209	0.111031	1.42223	-9999
PAK4	Serine/threonine-protein kinase PAK4 (I)	O96013	pSLVGTPYWMAPELISR	S474	1.44148	2.4916	1.4098	2.99783
Acidic phosphosites
LARP7	Lupus La protein family protein	Q4G0J3	SRPTSEGpSDIESTEPQK	S268	1.24245	0.765535	-0.232769	2.67061
ZRANB2	Zinc finger Ran-binding doamin-containing protein 2 (I)	O95218	YNLDApSEEEDSNKK	S188	1.0545	0.387363	0.428678	0.978196
Other phosphosites
AHNAK	AHNAK 313 kDa protein	B5MEH8	ApSLGSLEGEAEAEASpSPK	S2819	1.09963	-9999	0.0662614	-0.444184
			EFSGPpSTPTGTLEFEGGEVSLEGGK	S2863	1.00935	-9999	1.67627	-0.309359
			EFSGPSTPpTGTLEFEGGEVSLEGGK	T2866	1.00935	-9999	1.62994	-0.321928
BAT3	Large proline-rich protein BAT3 (I)	P46379	APPQTHLPSGASSGTGpSASATHGGGSPPGTR	S104	1.71677	1.66448	2.40026	0.775683
			APPQTHLPSGASSGTGSASApTHGGGSPPGTR	T108	1.71501	1.67942	2.41981	0.803227
BCLAF1	Bcl-2-associated transcription factor 1(I)	Q9NYF8	SSATSGDIWPGLpSAYDNSPR	S217	1.09761	1.61164	1.17568	0.687956
KCNT2	Potassium channel, subfamily T, member 2	Q6UVM3	SpSLRIR	S59	1.13291	0.495695	1.426	-0.997117
NCL	NCL protein	Q9BQ02	VVVSPpTKK	T69	1.09018	0.662661	0.227741	0.172488
PNN	Pinin (I)	Q9H307-1/2	QQDpSQPEEVMDVLEMVENVK	S381/248	1.27977	0.960512	2.80364	2.20101
SEC31A	SEC31 homolog A (I)	O94979	EQpTLSPTITSGLHNIAR	T1122	1.45943	0.104337	-1.67577	-1.02327	CAMK2G, TGFBR2, ACVR2B, DMPK, MAP4K4, TNIK
UBAP2L	Ubiquitin-associated protein 2-like (I)	Q14157	SPAVATSTAAPPPPSSPLPpSK	T1047	1.03281	0.947105	1.05797	-0.00723157	CDK2, GSK3B, GSK3A, MAPKAPK2/5/3
Downregulated phosphorylation events
Proline directed phosphosites
ABI1	Abl interactor 1 (I)	Q8IZP0	LGSQHpSPGR	S225	-1.18442	-1.18115	-1.93236	-0.668868	CDK2, MAPK14/11/13
AKAP12	A-kinase anchor protein 12 (I)	A6NEC7	SAESPTpSPVTSETGSTFK	S188	-1.37333	-9999	-2.72738	0.22404
API5	Apoptosis inhibitor 5 (I)	Q9BZZ5	RASEDTTSGpSPPKK	S464	-1.70369	-3.75633	-3.44222	0.428678
DST	Bullous pemphigoid antigen 1(I)	O94833	AMVDSQQKpSPVK	S1056	-1.05289	-9999	1.10903	-9999
LRWD1	Leucine-rich and WD repeat-containing protein	Q9UFC0	RPDDVPLSLpSPSK	S335	-1.44222	-9999	-9999	-1.2723
LSM14A	LSM14 protein homolog A (I)	Q8ND56	pSPVSTRPLPSASQK	S216	-1.04097	0.507921	-0.305788	0.704872
MCM2	DNA replication licensing factor MCM2	P49736	RTDALTSpSPGR	S41	-1.24469	1.43456	-0.244685	0.46048
PALLD	Palladin	Q8WX93	pSPSGHPHVR	S880	-1.01742	-1.67577	-1.51046	-0.586406
RAP1GAP	RAP1 GTPase activating protein	P47736	AAGISLIVPGKpSPTR	S484	-1.52699	1.66129	0.828632	-9999
STUB1	STIP1 homology and U box-containing protein1(I)	Q9UNE7	LGAGGGpSPEKSPSAQELK	S19	-1.96578	-0.386468	-0.360305	-0.463947	CDK2, MAPK14/11/13
TJAP1	Tight junction-associated protein 1(I)	Q5JTD0	GpSPEEELPLPAFEK	S300	-2.35845	-0.577767	1.00863	-2.57347	CDK2, MAPK14/11/13
TNKS1BP1	182 kDa tankyrase 1-binding protein	Q9C0C2	LDpSPPPSPITEASEAAEAAEAGNLAVSSR	S494	-1.13924	-1.0862	-9999	-9999	CDK2, MAPK14/11/13
			LDSPPPpSPITEASEAAEAAEAGNLAVSSR	S498	-1.25498	-1.191	-9999	-9999
WRNIP1	ATPase WRNIP1(I)	Q96S55	RPAAAAAAGSApSPR	S153	-1.08927	0.125651	0.377401	1.1375	MAPK14/11/13, MAPK8/10/9
ZC3H13	Zinc finger CCCH-type containing 13	Q5T200	SLpSPSHLTEDR	S877	-1.63039	0.49057	1.09761	-1.24811
Basic phosphosites
KRT5	Keratin type II cytoskeletal 5	P13647	SFpSTASAITPSVSR	S18	-1.4344	-9999	-9999	-1.26188
LMNA	Lamin-A/C (I)	P02545	ASpSHSSQTQGGGSVTK	S404	-1.22095	-3.62593	0.00288251	0.952334
TMEM40	Transmembrane protein 40 (I)	Q8WWA1	RGpSDPASGEVEASQLR	S153	-1.29336	-5.64386	-2.08314	-9999
TNKS1BP1	182 kDa tankyrase 1-binding protein	Q9C0C2	RPpSQGPPAR	S1545	-1.01742	-1.18442	-0.897006	-0.00144342
Other phosphosites
ACACA	Acetyl-CoA carboxylase 1	Q13085	SSMpSGLHLVK	S80	-1.40354	-0.305788	-9999	-9999
DSP	Desmoplakin (I)	P15924	GLPSPYNMSSAPGpSR	S2825	-1.12029	-0.678072	-1.57777	-1.24127
KRT5	Keratin type II cytoskeletal 5	P13647	SFSTApSAITPSVSR	S21	-1.44222	-9999	-9999	-1.26882	NEK2, MAPKAPK2/5/3
			pSLYNLGGSK	S64	-1.91594	-9999	-9999	-9999
KRT6A	Keratin type II cytoskeletal 6A	P02538	SGFSSVpSVSR	S37	-1.00868	-9999	-9999	-9999
LMNA	Lamin-A/C (I)	P02545	ApSSHSSQTQGGGSVTK	S403	-1.22432	-3.52284	0.00288251	0.954569
MCM2	DNA replication licensing factor MCM2	P49736	RTDALpTSSPGR	T39	-1.22769	1.45101	-0.227692	0.479231	NEK2, MST2, MAP2K4/3/6, GSK3B/A, PRKAA1/2, DMPK, CSNK1E/A1/D
RP1	Oxygen-regulated protein 1	P56715	QpSVEAAIQVDPIEEETPK	S1064	-1.17137	0.476122	-0.625934	-0.272297
TNKS1BP1	182 kDa tankyrase 1-binding protein	Q9C0C2	LDSPPPSPIpTEASEAAEAAEAGNLAVSSR	T501	-1.13924	-1.0862	-9999	-9999
